# Supplementary material for: NET-(works) in arterial and venous thrombo-occlusive diseases
Source: PubMed Central journal article supplement (PMC10239889; doi:10.3389/fcvm.2023.1155512), 2023-05-22
Supplement: Datasheet1.pdf [file Datasheet1.pdf]

| <b>NET-inhibiting agent</b> | <b>Mechanism of action</b> |                                                       | <b>Author</b>                              |
|-----------------------------|----------------------------|-------------------------------------------------------|--------------------------------------------|
| Cl-amidine                  | PAD4 inhibitor             | Carotid artery plaque, murine                         | <i>Knight et al.</i> <sup>105</sup>        |
| GSK484                      | PAD4 inhibitor             | Acute myocardial infarction, murine                   | <i>Du et al.</i> <sup>106</sup>            |
| DNase I                     | NET degradation            | Photothrombotic stroke model, murine                  | <i>Peña-Martínez et al.</i> <sup>107</sup> |
| DNase I                     | NET degradation            | Atherosclerosis model, murine                         | <i>Warnatsch et al.</i> <sup>65</sup>      |
| DNase I                     | NET degradation            | Acute myocardial infarction, human                    | <i>Mangold et al.</i> <sup>87</sup>        |
| DNase I + rhADAMTS13        | NET degradation            | Myocardial ischemia/reperfusion (MI/R) injury, murine | <i>Savchenko et al.</i> <sup>108</sup>     |
| DNase I                     | NET degradation            | Acute ischemic stroke, human                          | <i>Ducroux et al.</i> <sup>89</sup>        |
| DNase I                     | NET degradation            | DVT, mice                                             | <i>von Brühl et al.</i> <sup>46</sup>      |
| DNase I                     | NET degradation            | DVT, mice                                             | <i>Brill et al.</i> <sup>109</sup>         |
| ASA                         | COX inhibitor              | Acute lung injury, murine                             | <i>Ortiz-Muñoz et al.</i> <sup>110</sup>   |
| ASA                         | COX inhibitor              | Sepsis model, murine                                  | <i>Carestia et al.</i> <sup>111</sup>      |
| Clopidogrel                 | P2Y12 inhibitor            | Acute lung injury, murine                             | <i>Pulavendran et al.</i> <sup>112</sup>   |
| Clopidogrel                 | P2Y12 inhibitor            | Renal ischemia reperfusion injury, murine             | <i>Jansen et al.</i> <sup>113</sup>        |
| Ticagrelor                  | P2Y12 inhibitor            | Pneumonia, human                                      | <i>Sexton et al.</i> <sup>114</sup>        |
| Ticagrelor                  | P2Y12 inhibitor            | Acute myocardial infarction, human                    | <i>Mitsios et al.</i> <sup>115</sup>       |
